# Supplementary material
Source: PubMed Central journal article supplement (PMC7190452)
Supplement: NIHMS1057310-supplement-Supp_info.pdf [file NIHMS1057310-supplement-Supp_info.pdf]

## Supplementary material

### **The crystal structure of the naturally split gp41-1 intein guides the engineering of orthogonal split inteins from *cis*-splicing inteins**

Hannes Michael Beyer<sup>1</sup>, Kornelia Malgorzata Mikula<sup>1</sup>, Mi Li<sup>2,3</sup>, Alexander Wlodawer<sup>2</sup>, Hideo Iwai<sup>1,\*</sup>

<sup>1</sup>Research Program in Structural Biology and Biophysics, Institute of Biotechnology, University of Helsinki, 00014 Helsinki, Finland

<sup>2</sup>Macromolecular Crystallography Laboratory, National Cancer Institute, Frederick, MD 21702, USA

<sup>3</sup>Basic Science Program, Leidos Biomedical Research, Frederick National Laboratory for Cancer Research, Frederick, MD 21702, USA

\*Corresponding author:

Hideo Iwai

Research Program in Structural Biology and Biophysics, Institute of Biotechnology, University of Helsinki, 00014 Helsinki, Finland

Phone: +358-2941 59752

E-mail: [hideo.iwai@helsinki.fi](mailto:hideo.iwai@helsinki.fi)

## Supplementary Table S1

Plasmids and oligonucleotides used in this study. Circularization of linear PCR products was done using Gibson-Cloning (Gibson *et al.*, 2009).

| Plasmid    | Description                                                                                                                                                                                                                                                                                                                                                                                                                                                                                                                                                                                       | Reference                   |
|------------|---------------------------------------------------------------------------------------------------------------------------------------------------------------------------------------------------------------------------------------------------------------------------------------------------------------------------------------------------------------------------------------------------------------------------------------------------------------------------------------------------------------------------------------------------------------------------------------------------|-----------------------------|
| pADHDuet21 | <b><i>P</i><sub>77</sub>::H<sub>6</sub>-GB1-GSY-gp41-1 intein-SSG-GB1</b><br><br>The gp41-1 intein coding sequence was PCR-amplified from pBHDuet37 using the oligonucleotides, J557:5'-GAAGGATCCTACTGCCTGGATCTGAAAACGCAG and J558:5'-CTGGTACCGCTGCTGTTGTGGGTCAGAATGTC, thereby adding sequence encoding the wild-type junction sequence at the positions -1 (Y), +1 (S), and +2 (S) to the intein. The PCR product was ligated into pSKDuet16 using <i>Bam</i> HI/ <i>Kpn</i> I restriction sites. The three residues of N- and C-terminal junction sequences are "GSY" and "SSG", respectively. | This work                   |
| pALBDuet28 | <b><i>P</i><sub>77</sub>::H<sub>6</sub>-GB1-<i>Npu</i>DnaB<sup>Δ290</sup> intein-GB1</b><br><br>An IPTG-inducible bacterial expression vector encoding the <i>Nostoc punctiforme</i> DnaB <sup>Δ290</sup> mini-intein having a non-essential endonuclease domain deleted, flanked by two GB1 domains with an N-terminal hexahistidine tag.                                                                                                                                                                                                                                                        | Aranko <i>et al.</i> (2014) |
| pBHDuet37  | <b><i>P</i><sub>77</sub>::H<sub>6</sub>-GB1-EGS-gp41-1 intein-SGT-GB1</b><br><br>The sequence encoding a fusion of the N- and C- terminal split fragments of the gp41-1 intein was codon-optimized for protein expression in <i>E. coli</i> and synthesized (IDT) with flanking <i>Bam</i> HI and <i>Kpn</i> I restriction sites and ligated into pSKDuet16 resulting in a bacterial expression vector encoding the gp41-1 intein flanked by two GB1 domains with N-terminal hexahistidine tag. The three residues of N- and C-terminal junction sequences are "EGS" and "SGT", respectively.     | This work                   |
| pBHDuet321 | <b><i>P</i><sub>77</sub>::H<sub>6</sub>-GB1-EGS-gp41-1<sup>Δ2aa</sup> intein-SGT-GB1</b><br><br>pBHDuet321 was constructed from pBHDuet37 by inverse PCR using the oligonucleotides J269:5'-CCTGTATATTGAAGAAGGTAAAAAGATTCTGAAAATTG and J270:5'-AATCTTTT-TACCTTCTTCAATATACAGGCACATGCCC, resulting in the loop sequence "IEEG" from the residues 86-91 "VKEMML".                                                                                                                                                                                                                                    | This work                   |
| pBHRSF38   | <b><i>P</i><sub>77</sub>::H<sub>6</sub>-SUMO-gp41-1(C1A)</b><br><br>The gp41-1 intein coding sequence was amplified from pBHDuet37 using the oligonucleotides I521:5'-TTGGATCCGGTGGTGCCCTGGATCTGAAAACGCAG and I522:5'-TTGGATCCGGTGGTGCCCTGGATCTGAAAACGCAG and ligated into pHYRSF53 using <i>Bam</i> HI/ <i>Hind</i> III, resulting in a bacterial expression vector for inactive gp41-1(C1A) intein with N-terminal SUMO fusion and N-terminal hexahistidine tag.                                                                                                                                | This work                   |

| Plasmid    | Description                                                                                                                                                                                                                                                                                                                                                                                                                                                                                                                | Reference                    |
|------------|----------------------------------------------------------------------------------------------------------------------------------------------------------------------------------------------------------------------------------------------------------------------------------------------------------------------------------------------------------------------------------------------------------------------------------------------------------------------------------------------------------------------------|------------------------------|
| pHBBAD106  | <b><i>P<sub>BAD</sub>::CS-NpuDnaE<sub>C</sub> intein-GB1-H<sub>6</sub></i></b><br>The 35-residue C-terminal split fragment of the <i>NpuDnaE</i> intein carrying the charge-swapping (CS) mutations K109E, K113E, and Q114E was PCR-amplified from pHBDuet093 together with GB1 sequence using the oligonucleotides SK094:5'-TAACATATGATCAAAATAGCCAC-ACG and HK158:5'-AGAATTCCGTTACGGTGTAGGTTTTG. The PCR product was ligated into <i>NdeI/EcoRI</i> -digested pMHBAD14, thereby attaching a C-terminal hexahistidine tag. | This work                    |
| pHBBAD113  | <b><i>P<sub>BAD</sub>::CI-NpuDnaB<sub>C39</sub> intein-GB1-H<sub>6</sub></i></b><br>Point mutations encoding S110K and I111K corresponding to the <i>NpuDnaB</i> <sup>Δ290</sup> sequence were introduced into the <i>NpuDnaB</i> <sub>C39</sub> , C-terminal 39-residue split fragment of <i>NpuDnaB</i> mini-intein, encoded in plasmid pSABAD250 by inverse PCR using the oligonucleotides L162:5'-GGGATGAAATAGTTAAAAAGGAATATAGTGGTGAGGAAG and L163:5'-CACCACTATATTCCTTTTAACTATTTTCATCCCAATAAAT.                        | This work<br>Addgene #121912 |
| pHBBAD168  | <b><i>P<sub>BAD</sub>::Oth-NpuDnaB<sub>C39</sub> intein-GB1-H<sub>6</sub></i></b><br>The plasmid was created from pSABAD250 by inverse PCR using the two oligonucleotides L286:5'-GGGATGAAATAGTTTCAAAGGAATATAGTGGTAAGGAAGAAGTGTT and L287:5'-AACACTTCTTCCTTACCACTATATTCCTTTGAAACTATTTTCATCCC, bearing the I111K and E116K substitutions.                                                                                                                                                                                   | This work<br>Addgene #121916 |
| pHBDuet021 | <b><i>P<sub>T7</sub>::H<sub>6</sub>-GB1-SGY-gp41-1 intein-SSS-GB1</i></b><br>The gp41-1 intein coding sequence was PCR-amplified from pBHDuet37 using the oligonucleotides HB013:5'-CAAACCTACACCGTAACGGAAGGATCCGGCTATTGCCTGGATC-TGAAAACGCAGGTG and HB014:5'-CGTTCAGGATAAGTTTGTACTGGGTACCGCTCGA-GCTGTTGTGGGTCAGAATGTCGTTT, containing the N- and C-terminal three natural extein sequences of "SGY" and "SSS". The PCR product was ligated into pBHDuet37 using <i>BamHI/KpnI</i> sites.                                    | This work                    |
| pHBDuet087 | <b><i>P<sub>T7</sub>::H<sub>6</sub>-GB1-SGY-gp41-1<sup>ΔKEMM</sup> intein-SSS-GB1</i></b><br>pHBDuet087 was created by inverse PCR from pHBDuet021 using the two oligonucleotides L144:5'-TGCCTGTATGTGGGTGGTCTGAAAAAGATTCTGAAAAT and L145:5'-CTTTTTCA-GACCACCCACATACAGGCACATGCCCTC, containing the "GG" loop sequence at the natural split site to replace "KEMM" (residues 87-90).                                                                                                                                        | This work                    |
| pHBDuet088 | <b><i>P<sub>T7</sub>::H<sub>6</sub>-GB1-EGS-gp41-1<sup>ΔKEMM</sup> intein-SGT-GB1</i></b><br>The plasmid was derived from pBHDuet37 using the two oligonucleotides L144 and L145 as described for pHBDuet087.                                                                                                                                                                                                                                                                                                              | This work                    |

| Plasmid    | Description                                                                                                                                                                                                                                                                                                                                                                                                                                                                                                                                                                                                                                                                                                                    | Reference                    |
|------------|--------------------------------------------------------------------------------------------------------------------------------------------------------------------------------------------------------------------------------------------------------------------------------------------------------------------------------------------------------------------------------------------------------------------------------------------------------------------------------------------------------------------------------------------------------------------------------------------------------------------------------------------------------------------------------------------------------------------------------|------------------------------|
| pHBDuet093 | <p><b><i>P<sub>T7</sub>::H<sub>6</sub>-GB1-CS-NpuDnaE intein-GB1</i></b></p> <p>pHBDuet093 was constructed from pSKDuet16 by two-step inverse PCR using the two oligonucleotides L137:5'-CACGATCGCGGAAAACAAAAGGTGTTTAAGTATTGTTTGAA and L138:5'-CCAAACAATACTTAAACACCTTTTGTTCGCGATCGTGCC, containing the charge-swapping (CS) mutations E52K, E54K, and E57K. The second inverse PCR was done using the two oligonucleotides L140:5'-AATGTCATAGTCATTTCTTCGCCTAAATATTAC-GTGTGGCTAT and L159:5'-TAGCCACACGTGAATATTTAGGCGAAGAAAATGTCTATGA-CATTG, bearing the K109E, K113E, and Q114E mutations.</p>                                                                                                                                 | This work                    |
| pHBDuet095 | <p><b><i>P<sub>T7</sub>::H<sub>6</sub>-GB1-CS-NpuDnaE<sub>N</sub> intein-GB1</i></b></p> <p>A PCR fragment containing H<sub>6</sub>-GB1-CS-NpuDnaE<sub>N</sub> with charge-swapping (CS) substitutions including the N-terminally His-tagged GB1 was amplified from pHBDuet093 using the oligonucleotides HB007:5'-TAATACGACTCACTATAGGGGAATTGTG and L135:5'-GTGCG-GCCGCAAGCTTAATTCGGCAAATTATCAACCCGC. The backbone vector was amplified from pHYRSF53 using J502:5'-TAAGCTTGC GGCCGCACTC and J549:5'-CCATGGTATAT-CTCCTTATTAAG, and assembled into plasmid pHBDuet095 using Gibson-Cloning.</p>                                                                                                                                 | This work                    |
| pHBDuet112 | <p><b><i>P<sub>T7</sub>::H<sub>6</sub>-GB1-NpuDnaB<sup>Δ290,I53K,P55K,T58E,S110K,I111K</sup> intein-GB1</i></b></p> <p>Charge-introducing substitutions encoding S110K and I111K were introduced into the <i>NpuDnaB<sup>Δ290</sup></i> mini-intein coding sequence by inverse PCR from pALBDuet28 using the oligonucleotides L162:5'-GGGATGAAATAGTTAAAAAGGAATATAGTGGTGAGGAAG and L163:5'-CACCCTATATTCCTTTTAACTATTTTCATCCCAATAAAT. Substitutions encoding I53K, P55K, and T58E were then introduced by inverse PCR using L160:5'-CGACTGGTAAAAAGAAGCTGTTTGAATTGACAACCTCGATTGGGG and L161:5'-CGAGTT-GTCAATTCAAACAGCTTCTTTTACCAGTCGAAAAAGCATT.</p>                                                                                | This work<br>Addgene #121912 |
| pHBDuet116 | <p><b><i>P<sub>T7</sub>::H<sub>6</sub>-GB1-Oth-NpuDnaB<sup>Δ290</sup><sub>ΔC39</sub> intein</i></b></p> <p>Charge-introducing substitutions encoding I53K, P55K, and T58E were first introduced into the <i>NpuDnaB<sup>Δ290</sup></i> mini-intein by inverse PCR on pALBDuet28 using the two oligonucleotides L160:5'-CGACTGGTAAAAAGAAGCTGTTTGAATTGACAACCTCGATTGGGG and L161:5'-CGAGTTGTCAATTCAAACAGCTTCTTTTACCAGTCGAAAAAGCATT. The 98 residue-comprising N-terminal split fragment was then amplified by PCR using HK151:5'-TAGGATCC-GGTGTTTAGCAGGCGATAGTC and HK297:5'-GTGAAGCTTAATTTCTTGGTAACTGAGATGTTCT and ligated into <i>Bam</i>HI/<i>Hind</i>III-digested pSKDuet01, thereby attaching N-terminal His-tagged GB1.</p> | This work<br>Addgene #121915 |

| Plasmid    | Description                                                                                                                                                                                                                                                                                                                                                                                                                                                                                                | Reference                    |
|------------|------------------------------------------------------------------------------------------------------------------------------------------------------------------------------------------------------------------------------------------------------------------------------------------------------------------------------------------------------------------------------------------------------------------------------------------------------------------------------------------------------------|------------------------------|
| pHBDuet139 | <b><i>P<sub>77</sub>::H<sub>6</sub>-GB1-CI-NpuDnaB<sup>Δ290</sup> intein-GB1</i></b><br><i>NpuDnaB<sup>Δ290,I53K,P55K,T58E,S110K,I111K</sup></i> residue E58 encoded in plasmid pHBDuet112 was mutated to K by inverse PCR using L284:5'-GACTGGTAAAAAGAAGCTGTTTAAATTGACAACTCGA-TTGG and L285:5'-TCGAGTTGTCAATTTAAACAGCTCTTTTTACCAGTCGAAAAAGC resulting in <i>cis</i> -splicing charge-introduced (CI)- <i>NpuDnaB<sup>Δ290</sup></i> intein encoding the I53K, P55K, T58K, S110K, and I111K substitutions. | This work<br>Addgene #121913 |
| pHBDuet140 | <b><i>P<sub>77</sub>::H<sub>6</sub>-GB1-Oth-NpuDnaB<sup>Δ290</sup> intein-GB1</i></b><br>pHBDuet140 was derived from pHBDuet112 by inverse PCR using the two oligonucleotides L286:5'-GGGATGAAATAGTTTCAAAGGAATATAGTGGAAGGAAGAAGTGTT and L287:5'-AACACTTCTTCTTACCCTATATTCCTTTGAACTATTTTCATCCC, introducing E116K. The final gene for the Oth- <i>NpuDnaB<sup>Δ290</sup></i> intein encodes the I53K, P55K, T58E, I111K, and E116K substitutions of the <i>NpuDnaB<sup>Δ290</sup></i> mini-intein.           | This work<br>Addgene #121914 |
| pHBDuet148 | <b><i>P<sub>77</sub>::H<sub>6</sub>-GB1-CI-NpuDnaB<sup>Δ290</sup><sub>ΔC39</sub> intein</i></b><br>The N-terminal split fragment CI- <i>NpuDnaB<sup>Δ290</sup><sub>ΔC39</sub></i> intein was constructed by introducing a single E58K mutation into pHBDuet116 by inverse PCR using the oligonucleotides L284:5'-GACTGGTAA-AAAGAAGCTGTTTAAATTGACAACTCGATTGG and L285:5'-TCGAGTTGT-CAATTTAAACAGCTCTTTTTACCAGTCGAAAAAGC.                                                                                     | This work<br>Addgene #121911 |
| pHBDuet182 | <b><i>P<sub>77</sub>::H<sub>6</sub>-GB1-SGY-gp41-1 intein-SGT-GB1</i></b><br>The gp41-1 intein coding sequence was PCR-amplified from pBHDuet37 using the oligonucleotides HB013 (see pHBDuet021) and J541:5'-CAGCGGTTTCTTTACCAGACTCG annealing to the vector backbone. The PCR product was ligated into pBHDuet37 using <i>Bam</i> HI/ <i>Kpn</i> I sites. Introducing the N- and C-terminal junction sequences "SGY" and "SGT", respectively.                                                            | This work                    |
| pHYRSF53   | <b><i>P<sub>77</sub>::H<sub>6</sub>-SUMO-NpuDnaE<sub>N</sub>-CBD</i></b><br>IPTG-inducible bacterial expression vector encoding hexahistidine-tagged fusion protein of SUMO, the native split N-terminal <i>Nostoc punctiforme</i> DnaE intein, and CBD.                                                                                                                                                                                                                                                   | Addgene #64696               |
| pMHBAD14   | <b><i>P<sub>BAD</sub>::NpuDnaE<sub>C</sub>-GB1-H<sub>6</sub></i></b><br>An arabinose-inducible bacterial expression vector encoding the C-terminal native split fragment (35 residues) of the <i>Nostoc punctiforme</i> DnaE intein with C-terminal GB1 and hexahistidine tag fusion.                                                                                                                                                                                                                      | Addgene #42304               |
| pSABAD250  | <b><i>P<sub>BAD</sub>::NpuDnaB<sub>C39</sub>-GB1-H<sub>6</sub></i></b><br>An arabinose-inducible bacterial expression vector encoding the C-terminal artificial split fragment (39 residues) of the <i>Nostoc punctiforme</i> DnaB intein with C-terminal GB1 and hexahistidine tag fusion.                                                                                                                                                                                                                | Addgene #45612               |

| Plasmid    | Description                                                                                                                                                                                                                                                                                   | Reference       |
|------------|-----------------------------------------------------------------------------------------------------------------------------------------------------------------------------------------------------------------------------------------------------------------------------------------------|-----------------|
| pSADuet259 | <b><i>P<sub>TT</sub>::H<sub>6</sub>-GB1-NpuDnaB<sup>Δ283</sup>ΔC39</i></b><br><br>IPTG-inducible bacterial expression vector encoding the N-terminal artificial split fragment (residues 1-98) of the <i>Nostoc punctiforme</i> DnaB intein with N-terminal GB1 and hexahistidine tag fusion. | Addgene #121910 |
| pSKBAD2    | <b><i>P<sub>BAD</sub>::NpuDnaE<sub>C</sub>-GB1</i></b><br><br>Arabinose-inducible bacterial expression vector encoding the C-terminal native split fragment (35 residues) of the <i>Nostoc punctiforme</i> DnaE intein with C-terminal GB1.                                                   | Addgene #15335  |
| pSKDuet01  | <b><i>P<sub>TT</sub>::H<sub>6</sub>-GB1-NpuDnaE<sub>N</sub></i></b><br><br>IPTG-inducible bacterial expression vector encoding the N-terminal split fragment (102 residues) of the <i>Nostoc punctiforme</i> DnaE intein with N-terminal GB1 and hexahistidine tag fusion.                    | Addgene #12172  |
| pSKDuet16  | <b><i>P<sub>TT</sub>::H<sub>6</sub>-GB1-NpuDnaE intein-GB1</i></b><br><br>IPTG-inducible bacterial expression vector encoding a fusion protein of the split DnaE intein fragments of <i>Nostoc punctiforme</i> flanked by two GB1 domains with an N-terminal hexahistidine tag.               | Addgene #41684  |

Abbreviations: CBD, chitin binding domain; DnaB, bacterial helicase; DnaE, catalytic  $\alpha$  subunit of DNA polymerase III; GB1, B1 domain of the *Streptococcus* sp. IgG binding protein G; H<sub>6</sub>, hexahistidine tag; IPTG, isopropyl  $\beta$ -D-1-thiogalactopyranoside; SUMO, yeast small ubiquitin-like modifier domain.

## Supplementary References

Aranko, A.S., Oeemig, J.S., Zhou, D., Kajander, T., Wlodawer, A., and Iwai, H. (2014b) Structure-based engineering and comparison of novel split inteins for protein ligation. *Mol. Biosyst.* 10, 1023–1034.

Gibson, D.G., Young, L., Chuang, R.-Y., Venter, J.C., Hutchison, C.A., and Smith, H.O. (2009). Enzymatic assembly of DNA molecules up to several hundred kilobases. *Nat. Methods* 6, 343–345.
